# Supplementary material for: Commiphora myrrh Supplementation Protects and Cures Ethanol-Induced Oxidative Alterations of Gastric Ulceration in Rats
Source: MDPI journal article supplement (doi:10.3390/antiox10111836), 2021-11-19
Supplement: s1 [file s1]

**Table S1.** Ingredients of basal diet.

| <b>Ingredients</b> | <b>g/kg diet</b> |
|--------------------|------------------|
| Corn flour         | 529.5            |
| Casein             | 200              |
| Sucrose            | 100              |
| Soybean oil        | 70               |
| Cellulose          | 50               |
| Mineral mix        | 35               |
| Vitamin mix        | 10               |
| L-cystine          | 3                |
| Choline            | 2.5              |

**Table S2.** Primer sequences of  $\alpha$ -SMA, iNOS, TLR4, and GAPDH

| Gene          | Accession No. | Primer's sequence |                                 |
|---------------|---------------|-------------------|---------------------------------|
| $\alpha$ -SMA | NM_031004.2   | F:                | 5'- GAGCGTGGCTATTCCTTCGTG -3'   |
|               |               | R:                | 5'- CAGTGGCCATCTCATTTCAAAGT -3' |
| iNOS          | NM_012611.3   | F:                | 5'-CACCACCCTCCTTGTTCAAC-3'      |
|               |               | R:                | 5'- CAATCCACAACCTCGCTCCAA -3'   |
| TLR4          | NM_019178.2   | F:                | 5'-AGCTTTGGTCAGTTGGCT-3'        |
|               |               | R:                | 5'-CAGGATGACACCATTGAAGC-3'      |
| GAPDH         | NM_017008.4   | F:                | 5'-GGGTGTGAACCACGAGAAATA-3'     |
|               |               | R:                | 5'-AGTTGTCATGGATGACCTTGG-3'     |

**GAPDH**; glyceraldehyde 3-phosphate dehydrogenase, **iNOS**; inducible nitric oxide synthase, **TLR4**; Toll-like receptor 4, and  **$\alpha$ -SMA**;  $\alpha$ -smooth muscle actin.
